# Supplementary material for: Mining, analyzing, and integrating viral signals from metagenomic data
Source: PubMed Central journal article supplement (PMC6425642; doi:10.1186/s40168-019-0657-y), 2019-03-19

● Bacteria  
○ Putative phage

**Treatment subjects**

- P10
- - - P11
- ⋯ P12
- P13
- - - P14
- ⋯ P15
- P17
- - - P18
- ⋯ P19
- P1
- - - P20
- ⋯ P21
- P22
- - - P2
- ⋯ P3
- P4
- - - P5
- ⋯ P9

**Control subjects**

- P23
- - - P25
- ⋯ P38
- P6
- - - P7
- ⋯ P8

**A**

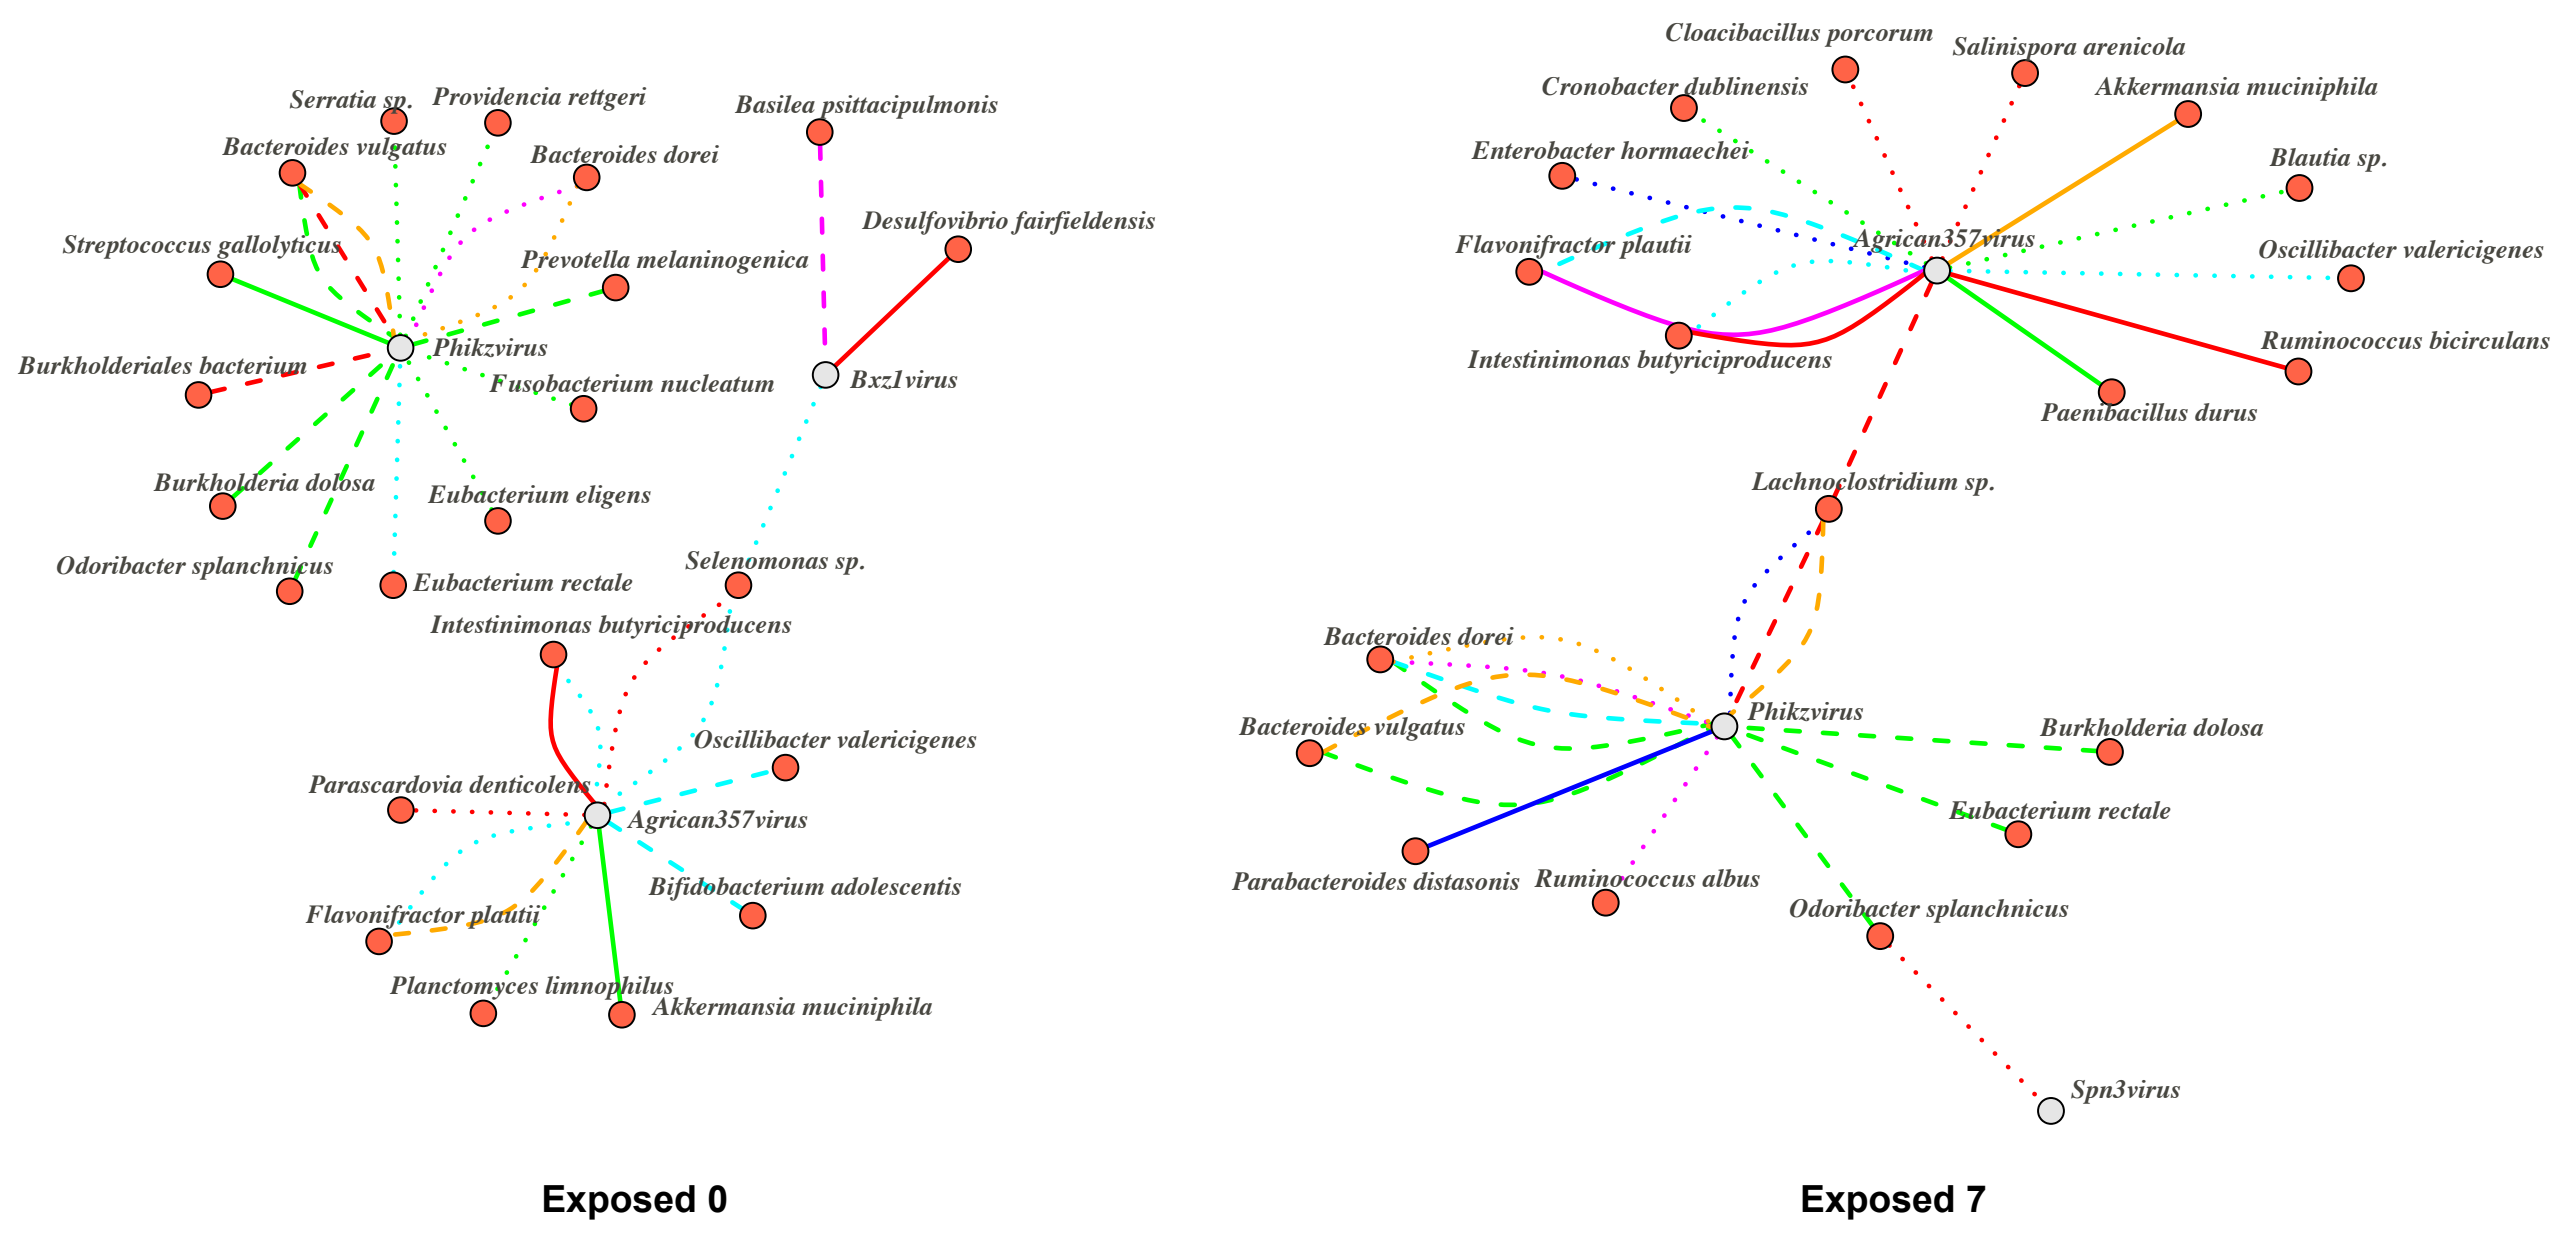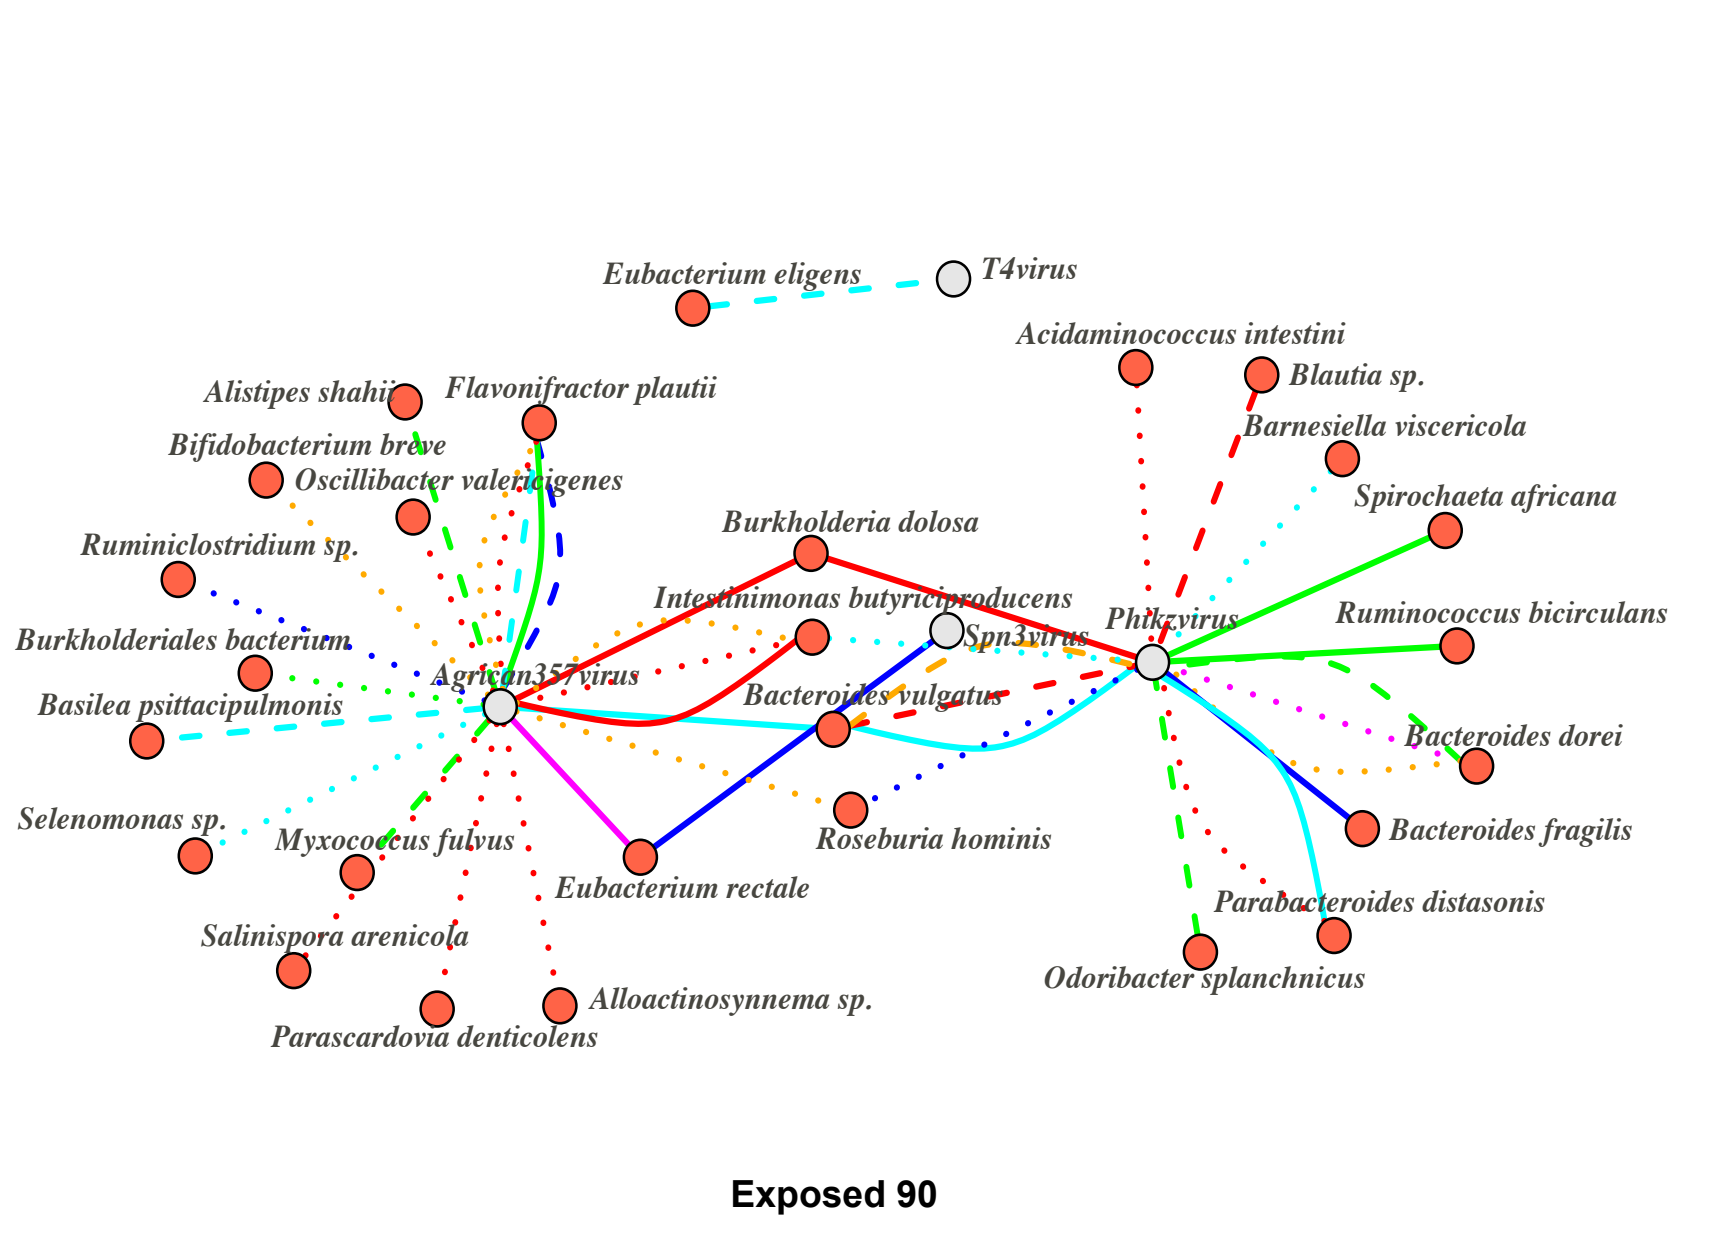

**B**

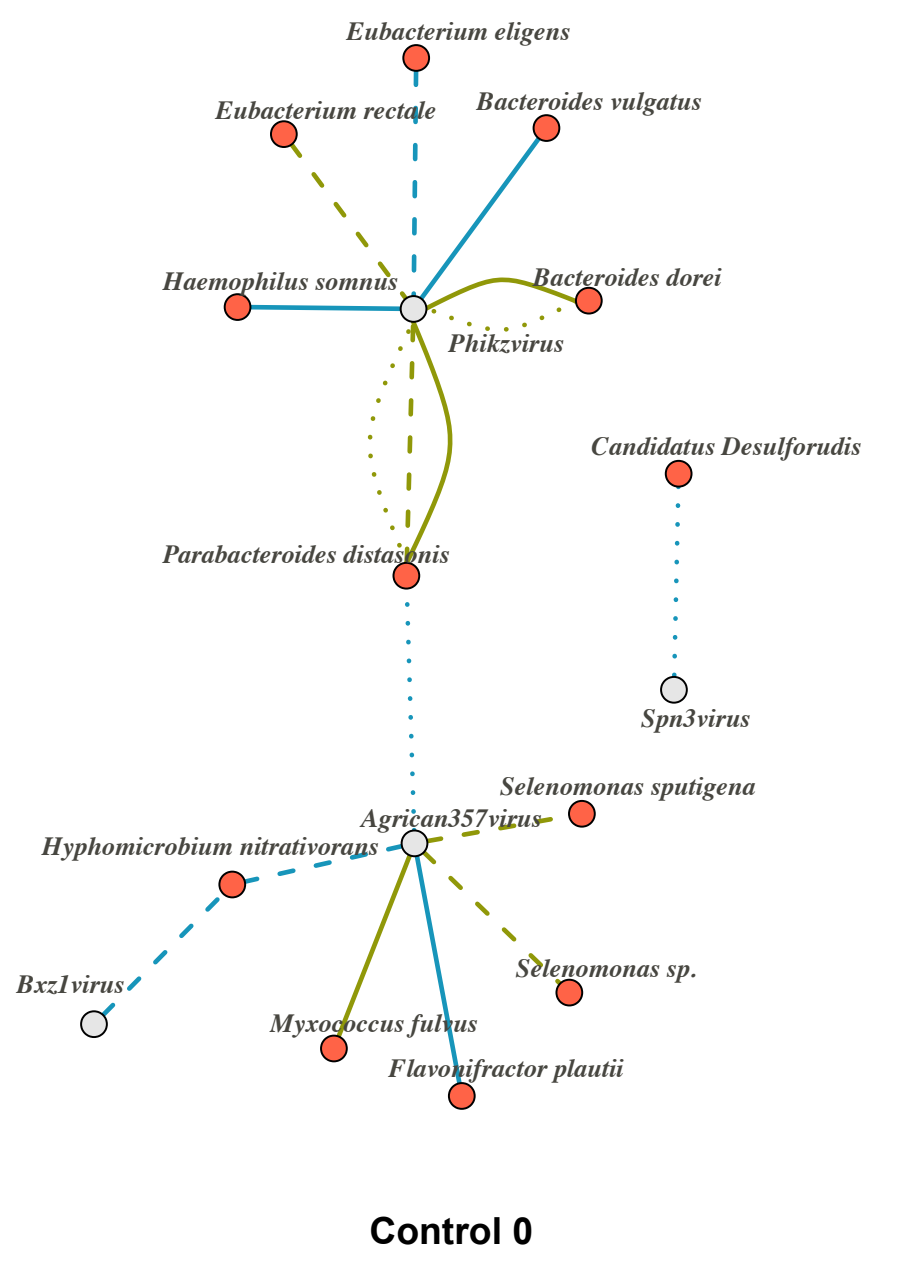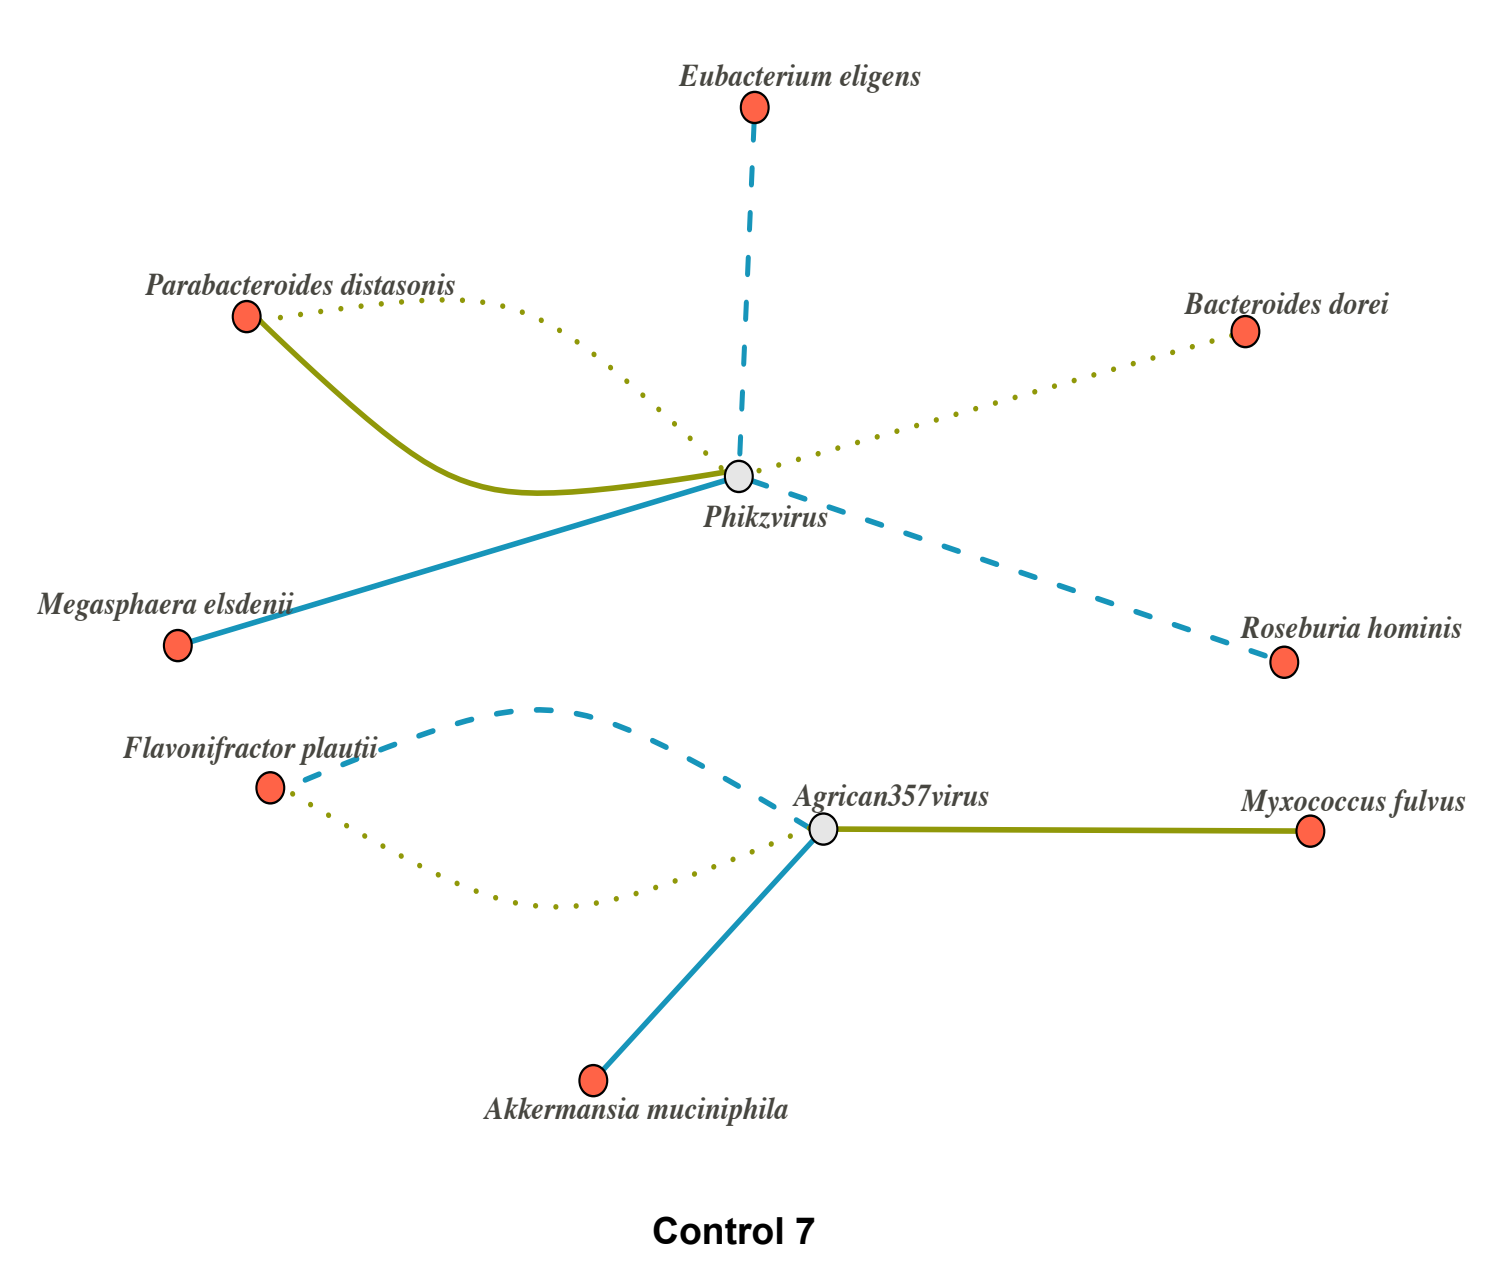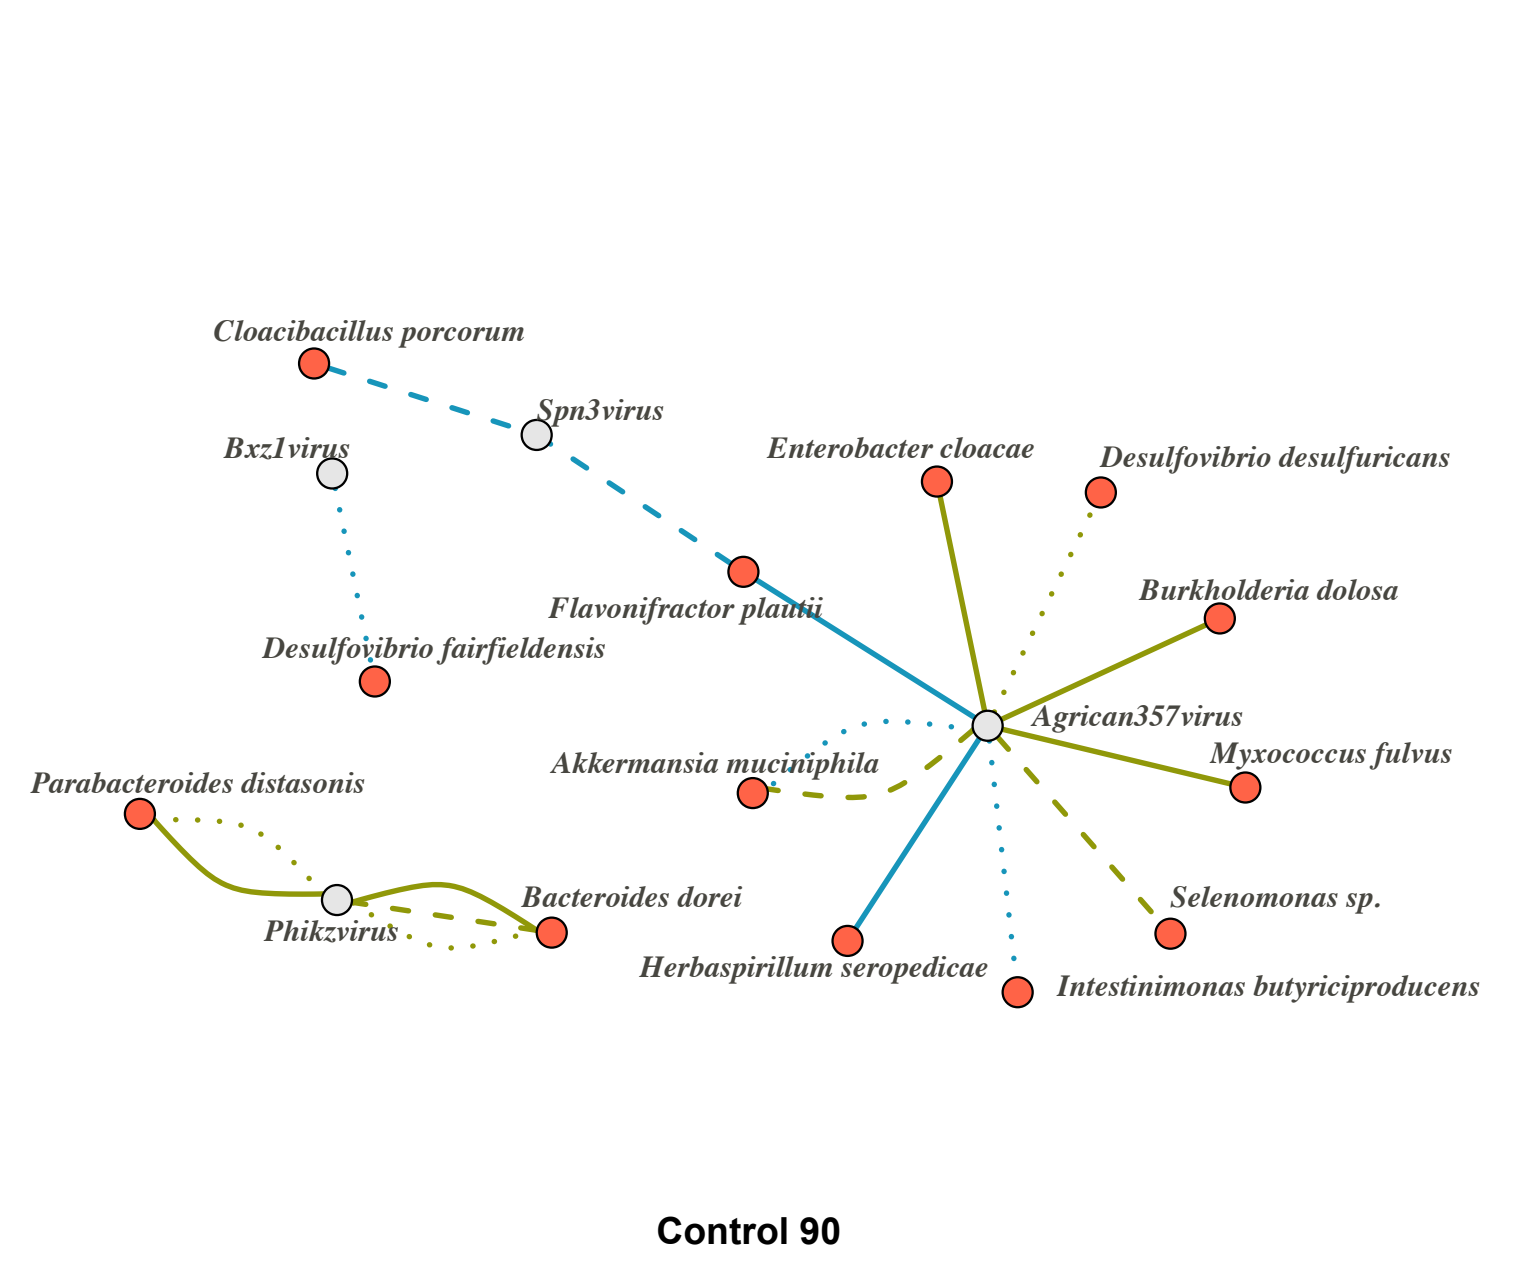

Supplement: 40168_2019_657_MOESM19_ESM.pdf [file 40168_2019_657_MOESM19_ESM.pdf]
