# Supplementary material for: Mining, analyzing, and integrating viral signals from metagenomic data
Source: Microbiome. 2019 Mar 19;7:42. doi: 10.1186/s40168-019-0657-y (PMC6425642; doi:10.1186/s40168-019-0657-y)
Supplement: Supplementary file 11 — Table S11. The list of 122 KO groups and 118 Pfam groups found significantly different (Wilcoxon rank-sum test, p < 0.05) exposed 0 vs exposed 7 using VirMiner. (XLSX 69 KB) (XLSX 66 kb) [file 40168_2019_657_MOESM11_ESM.xlsx]

## Sheet: KO groups
Table S11. The list of 122 KO groups found significantly different (Wilcoxon rank-sum test, P<0.05) Exposed 0 vs Exposed 7 using VirMiner
KO id	name	description
K00171	porD	pyruvate ferredoxin oxidoreductase delta subunit [EC:1.2.7.1]
K00248	ACADS, bcd	butyryl-CoA dehydrogenase [EC:1.3.8.1]
K00334	nuoE	NADH-quinone oxidoreductase subunit E [EC:1.6.5.3]
K00335	nuoF	NADH-quinone oxidoreductase subunit F [EC:1.6.5.3]
K00428	E1.11.1.5	cytochrome c peroxidase [EC:1.11.1.5]
K00441	frhB	coenzyme F420 hydrogenase subunit beta [EC:1.12.98.1]
K00620	argJ	glutamate N-acetyltransferase / amino-acid N-acetyltransferase [EC:2.3.1.35 2.3.1.1]
K00656	E2.3.1.54, pflD	formate C-acetyltransferase [EC:2.3.1.54]
K00798	MMAB, pduO	cob(I)alamin adenosyltransferase [EC:2.5.1.17]
K00872	thrB1	homoserine kinase [EC:2.7.1.39]
K01035	atoA	acetate CoA/acetoacetate CoA-transferase beta subunit [EC:2.8.3.8 2.8.3.9]
K01067	E3.1.2.1, ACH1	acetyl-CoA hydrolase [EC:3.1.2.1]
K01256	pepN	aminopeptidase N [EC:3.4.11.2]
K01621	xfp, xpk	xylulose-5-phosphate/fructose-6-phosphate phosphoketolase [EC:4.1.2.9 4.1.2.22]
K01761	E4.4.1.11	methionine-gamma-lyase [EC:4.4.1.11]
K01797	K01797	hypothetical protein
K01823	idi, IDI	isopentenyl-diphosphate Delta-isomerase [EC:5.3.3.2]
K01857	pcaB	3-carboxy-cis,cis-muconate cycloisomerase [EC:5.5.1.2]
K01894	gluQ	glutamyl-Q tRNA(Asp) synthetase [EC:6.1.1.-]
K01932	capB, pgsB	gamma-polyglutamate synthase [EC:6.3.2.-]
K01962	accA	acetyl-CoA carboxylase carboxyl transferase subunit alpha [EC:6.4.1.2 2.1.3.15]
K02017	modC	molybdate transport system ATP-binding protein [EC:3.6.3.29]
K02018	modB	molybdate transport system permease protein
K02020	modA	molybdate transport system substrate-binding protein
K02028	ABC.PA.A	polar amino acid transport system ATP-binding protein [EC:3.6.3.21]
K02030	ABC.PA.S	polar amino acid transport system substrate-binding protein
K02169	bioC	malonyl-CoA O-methyltransferase [EC:2.1.1.197]
K02278	cpaA, tadV	prepilin peptidase CpaA [EC:3.4.23.43]
K02453	gspD	general secretion pathway protein D
K02745	PTS-Aga-EIIB, agaV	PTS system, N-acetylgalactosamine-specific IIB component [EC:2.7.1.-]
K02795	PTS-Man-EIIC, manY	PTS system, mannose-specific IIC component
K02970	RP-S21, MRPS21, rpsU	small subunit ribosomal protein S21
K03091	sigH	RNA polymerase sporulation-specific sigma factor
K03311	TC.LIVCS	branched-chain amino acid:cation transporter, LIVCS family
K03406	mcp	methyl-accepting chemotaxis protein
K03430	phnW	2-aminoethylphosphonate-pyruvate transaminase [EC:2.6.1.37]
K03431	glmM	phosphoglucosamine mutase [EC:5.4.2.10]
K03550	ruvA	holliday junction DNA helicase RuvA [EC:3.6.4.12]
K03583	recC	exodeoxyribonuclease V gamma subunit [EC:3.1.11.5]
K03616	rnfB	electron transport complex protein RnfB
K03621	plsX	glycerol-3-phosphate acyltransferase PlsX [EC:2.3.1.15]
K03708	ctsR	transcriptional regulator of stress and heat shock response
K03756	potE	putrescine:ornithine antiporter
K03818	wcaF	putative colanic acid biosynthesis acetyltransferase WcaF [EC:2.3.1.-]
K03824	yhbS	putative acetyltransferase [EC:2.3.1.-]
K03932	lpqC	polyhydroxybutyrate depolymerase
K04072	adhE	acetaldehyde dehydrogenase / alcohol dehydrogenase [EC:1.2.1.10 1.1.1.1]
K04517	tyrA2	prephenate dehydrogenase [EC:1.3.1.12]
K05306	phnX	phosphonoacetaldehyde hydrolase [EC:3.11.1.1]
K05367	pbpC	penicillin-binding protein 1C [EC:2.4.1.129]
K05815	ugpE	sn-glycerol 3-phosphate transport system permease protein
K05822	dapH, dapD	tetrahydrodipicolinate N-acetyltransferase [EC:2.3.1.89]
K05878	dhaK	phosphoenolpyruvate---glycerone phosphotransferase subunit DhaK [EC:2.7.1.121]
K05879	dhaL	phosphoenolpyruvate---glycerone phosphotransferase subunit DhaL [EC:2.7.1.121]
K05985	rnmV	ribonuclease M5 [EC:3.1.26.8]
K06013	STE24	STE24 endopeptidase [EC:3.4.24.84]
K06206	sfsA	sugar fermentation stimulation protein A
K06281	hyaB, hybC	hydrogenase large subunit [EC:1.12.99.6]
K06282	hyaA, hybO	hydrogenase small subunit [EC:1.12.99.6]
K06310	yndD	spore germination protein
K06333	cotJB	spore coat protein JB
K06334	cotJC	spore coat protein JC
K06381	spoIID	stage II sporulation protein D
K06382	spoIIE	stage II sporulation protein E [EC:3.1.3.16]
K06384	spoIIM	stage II sporulation protein M
K06962	K06962	uncharacterized protein
K06967	trmK	tRNA (adenine22-N1)-methyltransferase [EC:2.1.1.217]
K06971	K06971	uncharacterized protein
K07033	K07033	uncharacterized protein
K07040	K07040	uncharacterized protein
K07042	ybeY, yqfG	probable rRNA maturation factor
K07088	K07088	uncharacterized protein
K07090	K07090	uncharacterized protein
K07238	TC.ZIP, zupT, ZRT3, ZIP2	zinc transporter, ZIP family
K07248	aldA	lactaldehyde dehydrogenase / glycolaldehyde dehydrogenase [EC:1.2.1.22 1.2.1.21]
K07315	rsbU_P	phosphoserine phosphatase RsbU/P [EC:3.1.3.3]
K07461	K07461	putative endonuclease
K07483	K07483	transposase
K07496	K07496	transposase
K07533	prsA	foldase protein PrsA [EC:5.2.1.8]
K07552	bcr, tcaB	MFS transporter, DHA1 family, multidrug resistance protein
K07574	yhbY	RNA-binding protein
K07590	RP-L7A, rplGB	large subunit ribosomal protein L7A
K07667	kdpE	two-component system, OmpR family, KDP operon response regulator KdpE
K07813	agrB	accessory gene regulator B
K07862	sstT	serine/threonine transporter
K08260	cbiZ	adenosylcobinamide hydrolase [EC:3.5.1.90]
K08296	sixA	phosphohistidine phosphatase [EC:3.1.3.-]
K08372	pepD	putative serine protease PepD [EC:3.4.21.-]
K09764	K09764	uncharacterized protein
K09788	prpF	2-methylaconitate isomerase [EC:5.3.3.-]
K09857	K09857	uncharacterized protein
K10231	kojP	kojibiose phosphorylase [EC:2.4.1.230]
K10819	E2.7.13.3	histidine kinase [EC:2.7.13.3]
K10824	nikE	nickel transport system ATP-binding protein [EC:3.6.3.24]
K11358	yhdR	aspartate aminotransferase [EC:2.6.1.1]
K11707	troA, mntA, znuA	manganese/zinc/iron transport system substrate-binding protein
K11708	troC, mntC, znuB	manganese/zinc/iron transport system permease protein
K11709	troD, mntD, znuB	manganese/zinc/iron transport system permease protein
K11710	troB, mntB, znuC	manganese/zinc/iron transport system ATP- binding protein
K12510	tadB	tight adherence protein B
K13002	wbyL	glycosyltransferase [EC:2.4.1.-]
K13922	pduP	propionaldehyde dehydrogenase [EC:1.2.1.87]
K14138	acsB	acetyl-CoA synthase [EC:2.3.1.169]
K14441	rimO	ribosomal protein S12 methylthiotransferase [EC:2.8.4.4]
K14540	rbgA	ribosome biogenesis GTPase A
K14665	amhX	amidohydrolase [EC:3.5.1.-]
K15585	nikB	nickel transport system permease protein
K15598	thiY	putative hydroxymethylpyrimidine transport system substrate-binding protein
K15669	hddC	D-glycero-alpha-D-manno-heptose 1-phosphate guanylyltransferase [EC:2.7.7.71]
K15922	yihQ	sulfoquinovosidase [EC:3.2.1.199]
K16328	psuK	pseudouridine kinase [EC:2.7.1.83]
K16329	psuG	pseudouridylate synthase [EC:4.2.1.70]
K16511	mecA1_2	adapter protein MecA 1/2
K16698	tuaG	teichuronic acid biosynthesis glycosyltransferase TuaG [EC:2.4.-.-]
K16785	ecfT	energy-coupling factor transport system permease protein
K16786	ecfA1	energy-coupling factor transport system ATP-binding protein [EC:3.6.3.-]
K16787	ecfA2	energy-coupling factor transport system ATP-binding protein [EC:3.6.3.-]
K16937	doxD	thiosulfate dehydrogenase [quinone] large subunit [EC:1.8.5.2]
K16958	tcyL	L-cystine transport system permease protein
K16959	tcyM	L-cystine transport system permease protein
K17218	sqr	sulfide:quinone oxidoreductase [EC:1.8.5.4]

## Sheet: Pfam groups
Table S11. The list of 118 Pfam groups found significantly different (Wilcoxon rank-sum test, P<0.05) Exposed 0 vs Exposed 7 using VirMiner
Pfam id	description
pfam00015	MCPsignal: Methyl-accepting chemotaxis protein (MCP) signalling domain
pfam00016	RuBisCO_large: Ribulose bisphosphate carboxylase large chain, catalytic domain
pfam00033	Cytochrome_B: Cytochrome b/b6/petB
pfam00117	GATase: Glutamine amidotransferase class-I
pfam00359	PTS_EIIA_2: Phosphoenolpyruvate-dependent sugar phosphotransferase system, EIIA 2
pfam00403	HMA: Heavy-metal-associated domain
pfam00419	Fimbrial: Fimbrial protein
pfam00441	Acyl-CoA_dh_1: Acyl-CoA dehydrogenase, C-terminal domain
pfam00690	Cation_ATPase_N: Cation transporter/ATPase, N-terminus
pfam01144	CoA_trans: Coenzyme A transferase
pfam01165	Ribosomal_S21: Ribosomal protein S21
pfam01228	Gly_radical: Glycine radical
pfam01257	2Fe-2S_thioredx: Thioredoxin-like [2Fe-2S] ferredoxin
pfam01330	RuvA_N: RuvA N terminal domain
pfam01371	Trp_repressor: Trp repressor protein
pfam01385	OrfB_IS605: Probable transposase
pfam01471	PG_binding_1: Putative peptidoglycan binding domain
pfam01588	tRNA_bind: Putative tRNA binding domain
pfam01609	DDE_Tnp_1: Transposase DDE domain
pfam01717	Meth_synt_2: Cobalamin-independent synthase, Catalytic domain
pfam01769	MgtE: Divalent cation transporter
pfam01925	TauE: Sulfite exporter TauE/SafE
pfam01960	ArgJ: ArgJ family
pfam01968	Hydantoinase_A: Hydantoinase/oxoprolinase
pfam01985	CRS1_YhbY: CRS1 / YhbY (CRM) domain
pfam01987	AIM24: Mitochondrial biogenesis AIM24
pfam01996	F420_ligase: F420-0:Gamma-glutamyl ligase
pfam02036	SCP2: SCP-2 sterol transfer family
pfam02361	CbiQ: Cobalt transport protein
pfam02413	Caudo_TAP: Caudovirales tail fibre assembly protein, lambda gpK
pfam02504	FA_synthesis: Fatty acid synthesis protein
pfam02535	Zip: ZIP Zinc transporter
pfam02572	CobA_CobO_BtuR: ATP:corrinoid adenosyltransferase BtuR/CobO/CobP
pfam02683	DsbD: Cytochrome C biogenesis protein transmembrane region
pfam02733	Dak1: Dak1 domain
pfam02734	Dak2: DAK2 domain
pfam02901	PFL-like: Pyruvate formate lyase-like
pfam03150	CCP_MauG: Di-haem cytochrome c peroxidase
pfam03255	ACCA: Acetyl co-enzyme A carboxylase carboxyltransferase alpha subunit
pfam03437	BtpA: BtpA family
pfam03486	HI0933_like: HI0933-like protein
pfam03547	Mem_trans: Membrane transport protein
pfam03690	UPF0160: Uncharacterized protein family (UPF0160)
pfam03750	DUF310: Protein of unknown function (DUF310)
pfam03886	ABC_trans_aux: ABC-type transport auxiliary lipoprotein component
pfam04014	MazE_antitoxin:Antidote-toxin recognition MazE, bacterial antitoxin
pfam04093	MreD: rod shape-determining protein MreD
pfam04227	Indigoidine_A: Indigoidine synthase A like protein
pfam04257	Exonuc_V_gamma: Exodeoxyribonuclease V, gamma subunit
pfam04301	DUF452: Protein of unknown function (DUF452)
pfam04303	PrpF: PrpF protein
pfam04647	AgrB: Accessory gene regulator B
pfam04816	TrmK: tRNA (adenine(22)-N(1))-methyltransferase
pfam05106	Phage_holin_3_1: Phage holin family (Lysis protein S)
pfam05389	MecA: Negative regulator of genetic competence (MecA)
pfam05525	Branch_AA_trans: Branched-chain amino acid transport protein
pfam05766	NinG: Bacteriophage Lambda NinG protein
pfam05838	Glyco_hydro_108: Glycosyl hydrolase 108
pfam05848	CtsR: Firmicute transcriptional repressor of class III stress genes (CtsR)
pfam05926	Phage_GPL: Phage head completion protein (GPL)
pfam05991	NYN_YacP: YacP-like NYN domain
pfam06081	ArAE_1: Aromatic acid exporter family member 1
pfam06082	YjbH: Exopolysaccharide biosynthesis protein YbjH
pfam06107	DUF951: Bacterial protein of unknown function (DUF951)
pfam06135	DUF965: Bacterial protein of unknown function (DUF965)
pfam06165	Glyco_transf_36: Glycosyltransferase family 36
pfam06257	VEG: Biofilm formation stimulator VEG
pfam06891	P2_Phage_GpR: P2 phage tail completion protein R (GpR)
pfam07136	DUF1385: Protein of unknown function (DUF1385)
pfam07338	DUF1471: Protein of unknown function (DUF1471)
pfam08478	POTRA_1: POTRA domain, FtsQ-type
pfam08503	DapH_N: Tetrahydrodipicolinate succinyltransferase N-terminal
pfam08645	PNK3P: Polynucleotide kinase 3 phosphatase
pfam08668	HDOD: HDOD domain
pfam08797	HIRAN: HIRAN domain
pfam08876	DUF1836: Domain of unknown function (DUF1836)
pfam08984	DUF1858: Domain of unknown function (DUF1858)
pfam09364	XFP_N: XFP N-terminal domain
pfam09419	PGP_phosphatase: Mitochondrial PGP phosphatase
pfam09563	RE_LlaJI: LlaJI restriction endonuclease
pfam09614	Cas_Csy2: CRISPR-associated protein (Cas_Csy2)
pfam09615	Cas_Csy3: CRISPR-associated protein (Cas_Csy3)
pfam09989	DUF2229: CoA enzyme activase uncharacterized domain (DUF2229)
pfam10503	Esterase_phd: Esterase PHB depolymerase
pfam10588	NADH-G_4Fe-4S_3: NADH-ubiquinone oxidoreductase-G iron-sulfur binding region
pfam10668	Phage_terminase: Phage terminase small subunit
pfam10743	Phage_Cox: Regulatory phage protein cox
pfam11578	DUF3237: Protein of unknown function (DUF3237)
pfam11790	Glyco_hydro_cc: Glycosyl hydrolase catalytic core
pfam12652	CotJB: CotJB protein
pfam12712	DUF3805: Domain of unknown function (DUF3805)
pfam12822	ECF_trnsprt: ECF transporter, substrate-specific component
pfam12895	ANAPC3: Anaphase-promoting complex, cyclosome, subunit 3
pfam12917	HD_2: HD containing hydrolase-like enzyme
pfam12970	DUF3858: Domain of Unknown Function with PDB structure (DUF3858)
pfam12994	DUF3878: Domain of unknown function, E. rectale Gene description (DUF3878)
pfam13088	BNR_2: BNR repeat-like domain
pfam13098	Thioredoxin_2: Thioredoxin-like domain
pfam13196	DUF4012: Protein of unknown function (DUF4012)
pfam13200	DUF4015: Putative glycosyl hydrolase domain
pfam13239	2TM: 2TM domain
pfam13331	DUF4093: Domain of unknown function (DUF4093)
pfam13340	DUF4096: Putative transposase of IS4/5 family (DUF4096)
pfam13432	TPR_16: Tetratricopeptide repeat
pfam13438	DUF4113: Domain of unknown function (DUF4113)
pfam13485	Peptidase_MA_2: Peptidase MA superfamily
pfam13487	HD_5: HD domain
pfam13530	SCP2_2: Sterol carrier protein domain
pfam13581	HATPase_c_2: Histidine kinase-like ATPase domain
pfam13676	TIR_2: TIR domain
pfam13911	AhpC-TSA_2: AhpC/TSA antioxidant enzyme
pfam13930	Endonuclea_NS_2: DNA/RNA non-specific endonuclease
pfam13970	DUF4221: Domain of unknown function (DUF4221)
pfam14102	Caps_synth_CapC: Capsule biosynthesis CapC
pfam14195	DUF4316: Domain of unknown function (DUF4316)
pfam14243	DUF4343: Domain of unknown function (DUF4343)
pfam14287	DUF4368: Domain of unknown function (DUF4368)
pfam14354	Lar_restr_allev: Restriction alleviation protein Lar
