# Supplementary material for: Mining, analyzing, and integrating viral signals from metagenomic data
Source: Microbiome. 2019 Mar 19;7:42. doi: 10.1186/s40168-019-0657-y (PMC6425642; doi:10.1186/s40168-019-0657-y)
Supplement: Supplementary file 12 — Table S12. The predicted phage-host interactions in the independent cohort of humans treated with antibiotics at species level. (XLSX 52 KB) (XLSX 40 kb) [file 40168_2019_657_MOESM12_ESM.xlsx]

## Sheet: antibiotics exposed
Table S12. The predicted phage-host interactions in human treated with antibiotics at species level.
sample ID	bacterial contigs	bacterial species	identified phage contigs	phage species
P21E90	contig-150_10860	Acidaminococcus intestini	contig-150_7261	Pseudomonas phage 201phi2-1
P21E90	contig-150_2696	Alloactinosynnema sp.	contig-150_1124	Erwinia virus Deimos
P14E7	contig-150_28819	Bacteroides dorei	contig-150_472	Pseudomonas phage 201phi2-1
P14E90	contig-150_36928	Bacteroides dorei	contig-150_755	Pseudomonas phage 201phi2-1
P18E7	contig-150_4732	Bacteroides dorei	contig-150_875	Pseudomonas phage 201phi2-1
P3E0	contig-150_40474	Bacteroides dorei	contig-150_301	Pseudomonas phage 201phi2-1
P3E7	contig-150_53769	Bacteroides dorei	contig-150_12	Pseudomonas phage 201phi2-1
P3E90	contig-150_1542	Bacteroides dorei	contig-150_248	Pseudomonas phage 201phi2-1
P9E0	contig-150_2788	Bacteroides dorei	contig-150_47	Pseudomonas phage 201phi2-1
P9E7	contig-150_1061	Bacteroides dorei	contig-150_46	Pseudomonas phage 201phi2-1
P9E90	contig-150_4392	Bacteroides dorei	contig-150_74	Pseudomonas phage 201phi2-1
P10E90	contig-150_51107	Bacteroides fragilis	contig-150_203	Pseudomonas phage 201phi2-1
P14E0	contig-150_193	Bacteroides vulgatus	contig-150_5883	Pseudomonas phage 201phi2-1
P14E7	contig-150_1160	Bacteroides vulgatus	contig-150_302	Pseudomonas phage 201phi2-1
P14E7	contig-150_17964	Bacteroides vulgatus	contig-150_6408	Pseudomonas phage 201phi2-1
P17E90	contig-150_49021	Bacteroides vulgatus	contig-150_4540	Pseudomonas phage 201phi2-1
P20E0	contig-150_24362	Bacteroides vulgatus	contig-150_335	Pseudomonas phage 201phi2-1
P20E0	contig-150_26535	Bacteroides vulgatus	contig-150_84	Pseudomonas phage 201phi2-1
P20E90	contig-150_21314	Bacteroides vulgatus	contig-150_409	Pseudomonas phage 201phi2-1
P20E90	contig-150_23356	Bacteroides vulgatus	contig-150_26	Pseudomonas phage 201phi2-1
P5E0	contig-150_11833	Bacteroides vulgatus	contig-150_193	Pseudomonas phage 201phi2-1
P5E7	contig-150_9246	Bacteroides vulgatus	contig-150_622	Pseudomonas phage 201phi2-1
P5E90	contig-150_10308	Bacteroides vulgatus	contig-150_826	Pseudomonas phage 201phi2-1
P19E90	contig-150_26154	Barnesiella viscericola	contig-150_562	Pseudomonas phage 201phi2-1
P18E90	contig-150_4817	Basilea psittacipulmonis	contig-150_1914	Erwinia virus Deimos
P18E90	contig-150_4817	Basilea psittacipulmonis	contig-150_4990	Erwinia virus Deimos
P2E0	contig-150_8035	Basilea psittacipulmonis	contig-150_672	Mycobacterium virus Bxz1
P18E0	contig-150_1514	Bifidobacterium adolescentis	contig-150_328	Erwinia virus Simmy50
P20E90	contig-150_1505	Blautia sp.	contig-150_2516	Pseudomonas phage 201phi2-1
P14E0	contig-150_21637	Burkholderia dolosa	contig-150_99	Pseudomonas phage 201phi2-1
P14E0	contig-150_44710	Burkholderia dolosa	contig-150_370	Pseudomonas phage 201phi2-1
P14E7	contig-150_12698	Burkholderia dolosa	contig-150_639	Pseudomonas phage 201phi2-1
P14E7	contig-150_13003	Burkholderia dolosa	contig-150_639	Pseudomonas phage 201phi2-1
P1E90	contig-150_41921	Burkholderia dolosa	contig-150_98	Pseudomonas phage 201phi2-1
P15E90	contig-150_627	Burkholderiales bacterium	contig-150_51	Erwinia virus Deimos
P20E0	contig-150_1002	Burkholderiales bacterium	contig-150_2961	Pseudomonas phage 201phi2-1
P15E7	contig-150_8800	Cronobacter dublinensis	contig-150_84	Erwinia virus Simmy50
P1E0	contig-150_1743	Desulfovibrio fairfieldensis	contig-150_4600	Mycobacterium virus Bxz1
P18E90	contig-150_823	Eubacterium eligens	contig-150_428	Prochlorococcus phage P-SSM2
P15E0	contig-150_2126	Eubacterium eligens	contig-150_313	Pseudomonas phage 201phi2-1
P14E7	contig-150_5119	Eubacterium rectale	contig-150_168	Pseudomonas phage 201phi2-1
P19E0	contig-150_37621	Eubacterium rectale	contig-150_819	Pseudomonas phage 201phi2-1
P10E90	contig-150_2980	Eubacterium rectale	contig-150_6071	Salmonella virus SPN3US
P18E7	contig-150_2710	Flavonifractor plautii	contig-150_680	Erwinia virus Deimos
P18E7	contig-150_6576	Flavonifractor plautii	contig-150_310	Erwinia virus Deimos
P18E90	contig-150_2034	Flavonifractor plautii	contig-150_6277	Erwinia virus Deimos
P21E90	contig-150_10325	Flavonifractor plautii	contig-150_440	Erwinia virus Simmy50
P15E0	contig-150_3151	Fusobacterium nucleatum	contig-150_313	Pseudomonas phage 201phi2-1
P19E0	contig-150_81748	Intestinimonas butyriciproducens	contig-150_1003	Erwinia virus Deimos
P19E7	contig-150_3045	Intestinimonas butyriciproducens	contig-150_567	Erwinia virus Deimos
P1E0	contig-150_204	Intestinimonas butyriciproducens	contig-150_320	Erwinia virus Deimos
P1E7	contig-150_215	Intestinimonas butyriciproducens	contig-150_650	Erwinia virus Deimos
P1E90	contig-150_159	Intestinimonas butyriciproducens	contig-150_420	Erwinia virus Deimos
P21E90	contig-150_34337	Intestinimonas butyriciproducens	contig-150_231	Erwinia virus Simmy50
P19E90	contig-150_70941	Intestinimonas butyriciproducens	contig-150_7894	Pseudomonas phage 201phi2-1
P12E7	contig-150_756	Lachnoclostridium sp.	contig-150_205	Pseudomonas phage 201phi2-1
P20E7	contig-150_4016	Lachnoclostridium sp.	contig-150_441	Pseudomonas phage 201phi2-1
P20E7	contig-150_5111	Lachnoclostridium sp.	contig-150_441	Pseudomonas phage 201phi2-1
P5E7	contig-150_589	Lachnoclostridium sp.	contig-150_2241	Pseudomonas phage 201phi2-1
P14E0	contig-150_12366	Odoribacter splanchnicus	contig-150_377	Pseudomonas phage 201phi2-1
P14E0	contig-150_18118	Odoribacter splanchnicus	contig-150_377	Pseudomonas phage 201phi2-1
P14E0	contig-150_18118	Odoribacter splanchnicus	contig-150_992	Pseudomonas phage 201phi2-1
P14E7	contig-150_12624	Odoribacter splanchnicus	contig-150_388	Pseudomonas phage 201phi2-1
P14E90	contig-150_13822	Odoribacter splanchnicus	contig-150_611	Pseudomonas phage 201phi2-1
P14E90	contig-150_24350	Odoribacter splanchnicus	contig-150_611	Pseudomonas phage 201phi2-1
P21E7	contig-150_11604	Odoribacter splanchnicus	contig-150_734	Salmonella virus SPN3US
P18E0	contig-150_170	Oscillibacter valericigenes	contig-150_4010	Erwinia virus Deimos
P10E7	contig-150_2248	Parabacteroides distasonis	contig-150_657	Pseudomonas phage 201phi2-1
P17E90	contig-150_4109	Parabacteroides distasonis	contig-150_1396	Pseudomonas phage 201phi2-1
P21E90	contig-150_36	Parabacteroides distasonis	contig-150_22	Pseudomonas phage 201phi2-1
P21E90	contig-150_24399	Parascardovia denticolens	contig-150_1254	Erwinia virus Deimos
P21E0	contig-150_17724	Parascardovia denticolens	contig-150_3522	Erwinia virus Simmy50
P15E0	contig-150_10569	Planctomyces limnophilus	contig-150_131	Erwinia virus Deimos
P14E0	contig-150_27096	Prevotella melaninogenica	contig-150_992	Pseudomonas phage 201phi2-1
P15E0	contig-150_797	Providencia rettgeri	contig-150_160	Pseudomonas phage 201phi2-1
P12E90	contig-150_1290	Roseburia hominis	contig-150_179	Pseudomonas phage 201phi2-1
P12E90	contig-150_523	Ruminiclostridium sp.	contig-150_1250	Erwinia virus Deimos
P3E7	contig-150_29	Ruminococcus albus	contig-150_264	Pseudomonas phage 201phi2-1
P13E90	contig-150_10962	Ruminococcus bicirculans	contig-150_5295	Pseudomonas phage 201phi2-1
P13E90	contig-150_43711	Ruminococcus bicirculans	contig-150_5295	Pseudomonas phage 201phi2-1
P13E90	contig-150_54479	Ruminococcus bicirculans	contig-150_5295	Pseudomonas phage 201phi2-1
P13E90	contig-150_99463	Ruminococcus bicirculans	contig-150_5295	Pseudomonas phage 201phi2-1
P21E90	contig-150_15559	Salinispora arenicola	contig-150_1124	Erwinia virus Deimos
P19E0	contig-150_117197	Selenomonas sp.	contig-150_4140	Erwinia virus Deimos
P19E0	contig-150_107677	Selenomonas sp.	contig-150_8975	Mycobacterium virus Bxz1
P15E0	contig-150_431	Serratia sp.	contig-150_160	Pseudomonas phage 201phi2-1
P13E90	contig-150_3464	Spirochaeta africana	contig-150_938	Pseudomonas phage 201phi2-1
P13E0	contig-150_7017	Streptococcus gallolyticus	contig-150_364	Pseudomonas phage 201phi2-1

## Sheet: control
Table S12. The predicted phage-host interactions in control participants at species level .
sample ID	bacterial contigs	bacterial species	identified phage contigs	phage species
P23C7	contig-150_3495	Akkermansia muciniphila	contig-150_538	Erwinia virus Simmy50
P38C90	contig-150_347	Akkermansia muciniphila	contig-150_35	Erwinia virus Simmy50
P6C0	contig-150_5789	Bacteroides dorei	contig-150_182	Pseudomonas phage 201phi2-1
P6C90	contig-150_4435	Bacteroides dorei	contig-150_277	Pseudomonas phage 201phi2-1
P7C90	contig-150_1492	Bacteroides dorei	contig-150_193	Pseudomonas phage 201phi2-1
P8C0	contig-150_1721	Bacteroides dorei	contig-150_22	Pseudomonas phage 201phi2-1
P8C7	contig-150_2322	Bacteroides dorei	contig-150_26	Pseudomonas phage 201phi2-1
P8C90	contig-150_2034	Bacteroides dorei	contig-150_25	Pseudomonas phage 201phi2-1
P23C0	contig-130_4343	Bacteroides vulgatus	contig-130_188	Pseudomonas phage 201phi2-1
P38C0	contig-150_9397	Candidatus Desulforudis	contig-150_7599	Salmonella virus SPN3US
P25C90	contig-150_2780	Cloacibacillus porcorum	contig-150_590	Salmonella virus SPN3US
P38C90	contig-150_1741	Desulfovibrio fairfieldensis	contig-150_4600	Mycobacterium virus Bxz1
P6C90	contig-150_48514	Enterobacter cloacae	contig-150_166	Erwinia virus Deimos
P6C90	contig-150_25706	Enterobacter cloacae	contig-150_391	Erwinia virus Simmy50
P25C0	contig-150_3689	Eubacterium eligens	contig-150_258	Pseudomonas phage 201phi2-1
P25C7	contig-150_18	Eubacterium eligens	contig-150_461	Pseudomonas phage 201phi2-1
P7C0	contig-150_53431	Eubacterium rectale	contig-150_366	Pseudomonas phage 201phi2-1
P23C90	contig-150_5161	Flavonifractor plautii	contig-150_282	Erwinia virus Deimos
P25C7	contig-150_2541	Flavonifractor plautii	contig-150_1811	Erwinia virus Deimos
P25C90	contig-150_1549	Flavonifractor plautii	contig-150_590	Salmonella virus SPN3US
P23C0	contig-130_3163	Haemophilus somnus	contig-130_4594	Pseudomonas phage 201phi2-1
P25C0	contig-150_3544	Hyphomicrobium nitrativorans	contig-150_142	Erwinia virus Deimos
P25C0	contig-150_3544	Hyphomicrobium nitrativorans	contig-150_968	Erwinia virus Deimos
P25C0	contig-150_3544	Hyphomicrobium nitrativorans	contig-150_1430	Mycobacterium virus Bxz1
P38C90	contig-150_204	Intestinimonas butyriciproducens	contig-150_320	Erwinia virus Deimos
P23C7	contig-150_2681	Megasphaera elsdenii	contig-150_6892	Pseudomonas phage 201phi2-1
P38C0	contig-150_4177	Parabacteroides distasonis	contig-150_773	Erwinia virus Deimos
P6C0	contig-150_25386	Parabacteroides distasonis	contig-150_841	Pseudomonas phage 201phi2-1
P6C7	contig-150_11552	Parabacteroides distasonis	contig-150_459	Pseudomonas phage 201phi2-1
P6C7	contig-150_11552	Parabacteroides distasonis	contig-150_466	Pseudomonas phage 201phi2-1
P6C7	contig-150_11552	Parabacteroides distasonis	contig-150_467	Pseudomonas phage 201phi2-1
P6C7	contig-150_11552	Parabacteroides distasonis	contig-150_7	Pseudomonas phage 201phi2-1
P6C90	contig-150_5006	Parabacteroides distasonis	contig-150_1366	Pseudomonas phage 201phi2-1
P6C90	contig-150_5006	Parabacteroides distasonis	contig-150_162	Pseudomonas phage 201phi2-1
P7C0	contig-150_49	Parabacteroides distasonis	contig-150_64	Pseudomonas phage 201phi2-1
P8C0	contig-150_79	Parabacteroides distasonis	contig-150_12	Pseudomonas phage 201phi2-1
P8C0	contig-150_79	Parabacteroides distasonis	contig-150_121	Pseudomonas phage 201phi2-1
P8C7	contig-150_91	Parabacteroides distasonis	contig-150_147	Pseudomonas phage 201phi2-1
P8C7	contig-150_91	Parabacteroides distasonis	contig-150_320	Pseudomonas phage 201phi2-1
P8C90	contig-150_80	Parabacteroides distasonis	contig-150_83	Pseudomonas phage 201phi2-1
P25C7	contig-150_3600	Roseburia hominis	contig-150_461	Pseudomonas phage 201phi2-1
