# Supplementary material for: Mining, analyzing, and integrating viral signals from metagenomic data
Source: Microbiome. 2019 Mar 19;7:42. doi: 10.1186/s40168-019-0657-y (PMC6425642; doi:10.1186/s40168-019-0657-y)
Supplement: Supplementary file 18 — Table S18. The summary of quality control statistics in the Tara Oceans metagenomic samples and human gut samples that were used for the VirMiner training dataset. (XLSX 48 KB) (XLSX 50 kb) [file 40168_2019_657_MOESM18_ESM.xlsx]

## Sheet: Tara Oceans samples
Supplementary Table S18.The summary of quality control statistics in the Tara Oceans metagenomic samples.
sample	#of raw PE	# of final usable reads	% of final usable reads
ERS478040	346837034	337992674	0.9745
ERS488330	414976308	385492150	0.92895
ERS488346	408021182	392517870	0.962004
ERS488486	457560422	408373456	0.892502
ERS488509	386627816	359290000	0.929292
ERS488545	401751524	385395536	0.959288
ERS488569	397670070	361371930	0.908723
ERS488599	394022740	289430668	0.734553
ERS488649	241308424	216457434	0.897016
ERS488685	449416158	407487420	0.906704
ERS488714	251165916	240632060	0.95806
ERS488747	402101650	372323540	0.925944
ERS488799	261840264	227788770	0.869953
ERS488830	419686666	369304006	0.879952
ERS488919	387913058	362389756	0.934204
ERS489043	440504066	417221652	0.947146
ERS489074	463399290	433767504	0.936056
ERS489087	401723064	373240740	0.9291
ERS489134	430039794	407801590	0.948288
ERS489585	388947166	366237524	0.941613
ERS489917	629462328	567025984	0.90081
ERS490002	410378996	331261342	0.807208
ERS490029	290200094	261368908	0.900651
ERS490085	433566456	386538172	0.891532
ERS490124	320731360	288044024	0.898085
ERS490163	149855818	137437922	0.917134
ERS490183	157314750	152876730	0.971789
ERS490265	294061050	267123512	0.908395
ERS490296	262743724	223373836	0.850159
ERS490327	262754648	252764892	0.961981
ERS490373	389679638	346039504	0.88801
ERS490433	420077668	386290380	0.919569
ERS490476	327621278	317000278	0.967581
ERS490507	287954144	270690876	0.940049
ERS490542	461725288	234301838	0.507449
ERS490597	433352388	411056108	0.948549
ERS490659	474643436	306895520	0.646581
ERS490928	444220572	414121862	0.932244
ERS491095	436978564	407397060	0.932304
ERS492145	372118964	357997794	0.962052
ERS492177	340008658	322506618	0.948525

## Sheet: human gut samples
Table S18.The summary of quality control statistics in the human gut samples that were used for the VirMiner training dataset.
sample ID	#of raw PE	# of final usable reads	% of final usable reads
A1	54463832	53369178	0.979901
A2	55142954	53979584	0.978903
A3	59911260	58791298	0.981306
A4	54875760	53866286	0.981604
A5	56926352	55923348	0.982381
A6	56616842	55534010	0.980874
B1	55289892	53935444	0.975503
B2	55024128	53867130	0.978973
B3	55253344	53990294	0.977141
B4	58393402	57287866	0.981067
B5	55007656	53760920	0.977335
B6	56072232	36628488	0.653238
C1	55614628	54811796	0.985564
C2	68468738	67146602	0.98069
C3	58239252	57385460	0.98534
C4	61848342	60926096	0.985089
C5	55916348	54942490	0.982584
C6	65536760	64360936	0.982059
D1	55997020	55030600	0.982742
D2	58788446	57856004	0.984139
D3	73591066	72543586	0.985766
D4	79047612	77371594	0.978797
D5	55629952	54839244	0.985786
D6	61706468	60772648	0.984867
E1	54823424	53894254	0.983052
E2	68598636	67305126	0.981144
E3	56660880	55848406	0.985661
E4	54984988	54207862	0.985867
E5	63343744	62338186	0.984125
E6	55151806	54272310	0.984053
F1	59544650	58627436	0.984596
F2	64189582	63096528	0.982971
F3	66601956	65621540	0.985279
F4	62507092	61420248	0.982612
F5	79403900	76440258	0.962676
F6	73641556	72349176	0.98245
G1	57336590	56408040	0.983805
G2	63861056	62976868	0.986155
G3	64398318	63489672	0.98589
G4	56189284	54964440	0.978201
G5	65718378	64787890	0.985841
G6	56226476	55302692	0.98357
H1	68492494	66291296	0.967862
H2	127969690	124666846	0.97419
H3	57533326	56524272	0.982461
H4	65393164	64386010	0.984598
H5	55681992	54886084	0.985706
H6	63360382	62397690	0.984806
I1	55020764	53799910	0.977811
I2	131092538	129559036	0.988302
I3	64532670	63636936	0.98612
I4	56377666	55457518	0.983679
I5	67760732	66640628	0.98347
I6	55234648	53890968	0.975673
J1	69403132	68418348	0.985811
J2	57400830	56412912	0.982789
J4	55244602	54010500	0.977661
J5	59785420	58986818	0.986642
J6	62165290	61051190	0.982078
